# Supplementary material for: Binary mixtures of novel sulfoxides and water: intermolecular structure, dynamic properties, thermodynamics, and cluster analysis
Source: Royal Society of Chemistry journal article supplement (doi:10.1039/c8cp04012e), 2018-01-01
Supplement: c8cp04012e1.pdf [file c8cp04012e1.pdf]

# **SUPPLEMENTARY INFORMATION**

## **Binary Mixtures of Novel Sulfoxides and Water: Intermolecular Structure, Dynamic Properties, Thermodynamics, and Cluster Analysis**

Vitaly V. Chaban

PES, Vasilievsky Island, St. Petersburg, Russian Federation.

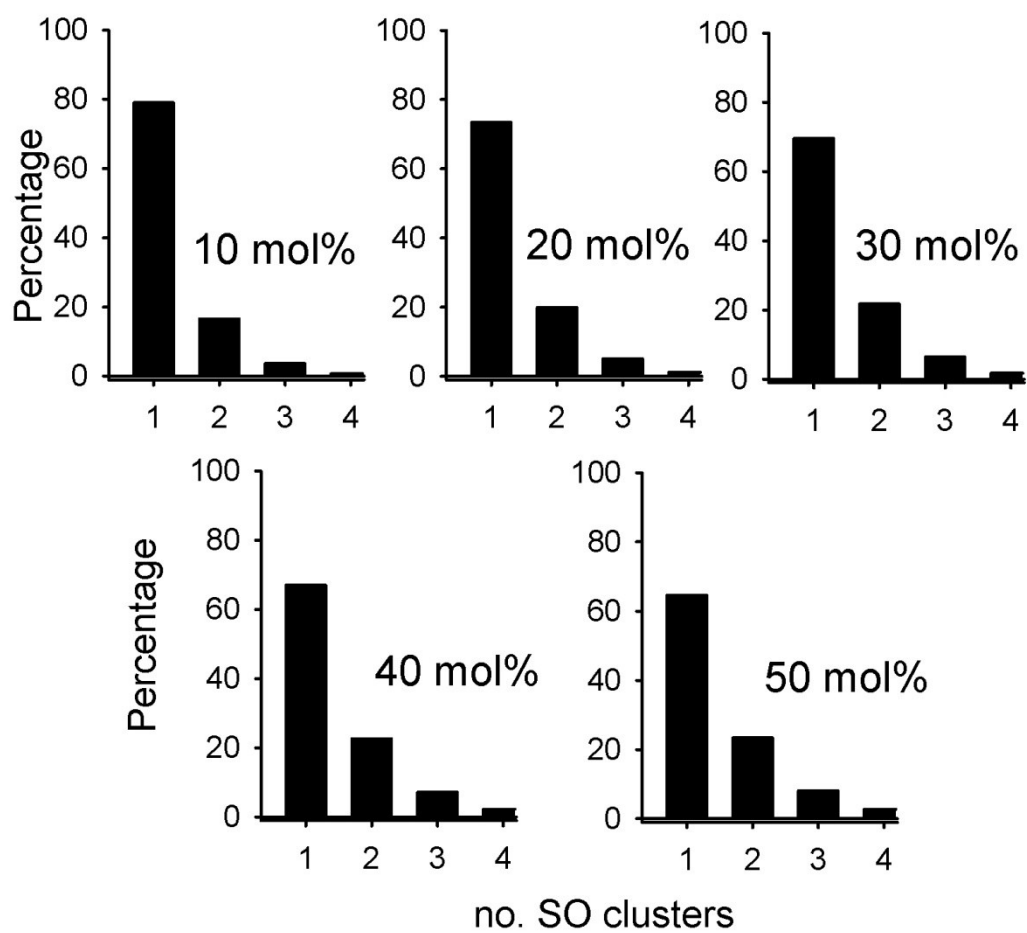

Figure S1. Sizes of the SO-OS aggregates (dipole-dipole interaction) in the EMSO-water mixtures,  $x$  (EMSO)=10-50 mol%.
